# Supplementary material for: Increased Phosphatase of Regenerating Liver-1 by Placental Stem Cells Promotes Hepatic Regeneration in a Bile-Duct-Ligated Rat Model
Source: MDPI journal article supplement (doi:10.3390/cells10102530), 2021-09-24
Supplement: s1 [file s1]

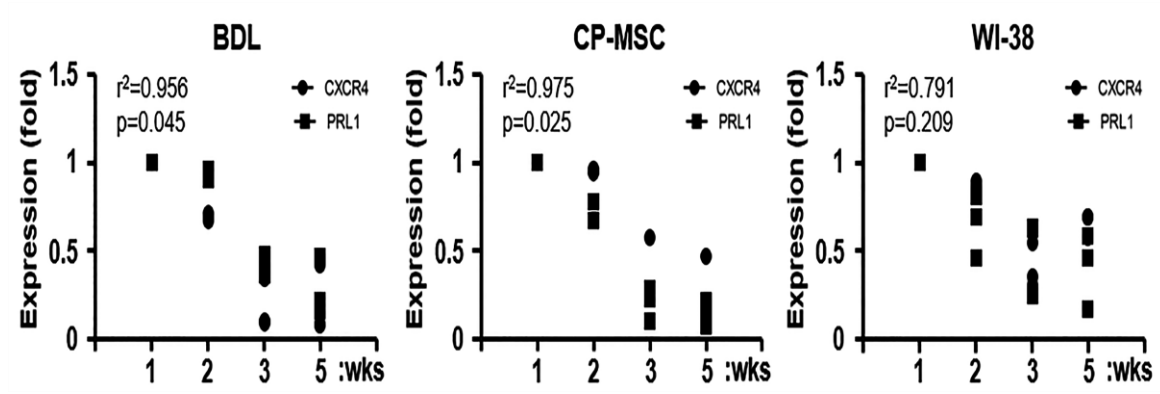

**Figure S1:** Correlation analysis between CXCR4 and PRL-1 expression in liver tissue of the BDL, CP-MSC, and WI-38 groups.
